14  
15  
16  
17  
18  
19  
20  
21  
22  
23  
24  
25  
26  
27  
28  
29  
30  
31  
32  
33  
34  
35

## ABSTRACT

The movement of organisms across habitat boundaries has important consequences for populations, communities, and ecosystems. However, because most species are not well adapted to all habitat types, dispersal into suboptimal habitats could induce physiological changes associated with persistence strategies that influence community assembly. For example, high rates of cross-boundary dispersal are thought to maintain sink populations of terrestrial bacteria in aquatic habitats, but these bacteria may also persist by lowering their metabolic activity, introducing metabolic heterogeneity that buffers the population against niche selection. To differentiate between these assembly processes, we analyzed bacterial composition along a hydrological flow path from terrestrial soils through an aquatic reservoir by sequencing the active and total (active + inactive) portions of the community. When metabolic heterogeneity was ignored, our data were consistent with views that cross-boundary dispersal is important for structuring aquatic bacterial communities. In contrast, we found evidence for strong niche selection when metabolic heterogeneity was explicitly considered, suggesting that, relative to persistence strategies, dispersal may have a weaker effect on aquatic community assembly than previously thought. By accounting for metabolic heterogeneity in complex communities, our findings clarify the roles of local- and regional-scale assembly processes in terrestrial-aquatic meta-ecosystems.

**Key words:** metacommunity, meta-ecosystem, bacteria, dormancy, dispersal, terrestrial–aquatic linkages

36

## INTRODUCTION

37       The movement of material and energy across habitat boundaries is important for the structure  
38 and function of recipient ecosystems (Polis et al. 2004, Gounand et al. 2018a). These spatial  
39 resource subsidies can stabilize population dynamics, alter food web structure, and modify  
40 biogeochemical cycles (Polis et al. 2004, Massol et al. 2011). However, in complex landscapes  
41 linked by spatial fluxes of resources and organisms, the process of community assembly remains  
42 less clear (Gounand et al. 2018a). Meta-ecosystem theory predicts that poorly adapted species  
43 dispersed across ecosystem boundaries will be eliminated from the recipient habitat via niche  
44 selection (Massol et al. 2017, Gounand et al. 2018a), unless resource flows sufficiently  
45 homogenize the landscape (Gravel et al. 2010). However, if generalist species are capable of  
46 tolerating a range of environmental conditions, then cross-boundary dispersal could affect  
47 community assembly in recipient habitats (Haegeman and Loreau 2014).

48       Habitats at the terrestrial-freshwater interface are ideal for addressing questions about meta-  
49 ecosystem ecology (Gounand et al. 2018b). Terrestrial ecosystems export large quantities of  
50 organic matter that support aquatic food webs, often through bacterial pathways (Berggren et al.  
51 2010). Furthermore, many of the bacteria responsible for processing allochthonous subsidies in  
52 aquatic habitats may be derived from terrestrial ecosystems via coupled transport with resource  
53 flows (Ruiz-González et al. 2015b). For example, in some north temperate lakes, it is estimated  
54 that nearly  $10^{20}$  bacterial cells are transported annually from terrestrial to aquatic ecosystems  
55 (Bergström and Jansson 2000). These high immigration rates should influence the composition  
56 and activity of bacterial assemblages via metacommunity processes, such as source-sink  
57 dynamics or mass effects that overcome niche selection (Crump et al. 2012, Lindström and  
58 Langenheder 2012, Ruiz-González et al. 2015a).

59        Although cross-boundary flows have been well documented, the fate of terrestrial-derived  
60 bacteria in aquatic ecosystems remains unclear (Langenheder and Lindström 2019). In part, this  
61 may be because both dispersal- and selection-based perspectives overlook the range of metabolic  
62 states within microbial communities. In nature, some microorganisms may respond to favorable  
63 environmental conditions via rapid growth, while others may face challenging conditions that  
64 limit or prevent growth (Lever et al. 2015). Many bacteria have evolved persistence strategies  
65 (e.g., spores, cysts, resting stages, slow growth) that buffer against harsh environmental  
66 transitions, such as those encountered when dispersed along terrestrial-aquatic flow paths  
67 (Barcina et al. 1997, Lennon and Jones 2011). By weakening the strength of local niche selection  
68 relative to dispersal (Nemergut et al. 2013, Locey et al. 2019, Wisnoski et al. 2019), these  
69 persistence strategies may increase the apparent similarity between terrestrial and aquatic  
70 bacterial communities, especially when techniques are used that lend equal weight to active, slow  
71 growing, and dormant bacteria (e.g., 16S rRNA gene sequencing). As a result, the importance of  
72 terrestrial-derived bacteria in aquatic community assembly may be obscured when inferred from  
73 diversity patterns that do not explicitly consider the metabolic heterogeneity that exists within  
74 bacterial communities.

75        In this study, we explored microbial community assembly along a hydrological flow path of a  
76 small reservoir. In this type of system, inputs from the terrestrial landscape occur upstream in the  
77 riverine zone, directional surface flow orients the passive dispersal of bacteria through the  
78 lacustrine zone, and emigration occurs over an impoundment (Thornton et al. 1990; Fig. 1). We  
79 hypothesized that dispersal maintains terrestrial-derived bacteria in the reservoir, promoting local  
80 ( $\alpha$ ) diversity and homogenizing among-site ( $\beta$ ) diversity at the aquatic-terrestrial interface, but  
81 that these taxa may not be metabolically active. Owing to niche selection, we hypothesized that

82 only a subset of the immigrating terrestrial bacteria become metabolically active members of the  
83 aquatic community.

84

85

## METHODS

86 ***Study system*** — University Lake is a meso-eutrophic reservoir located in Griffy Woods,  
87 Bloomington, Indiana, USA (39.189, -86.503) (Fig. 1). Created in 1911, the 3.2 ha impoundment  
88 has an operating volume of 150,000 m<sup>3</sup>. With a maximum depth of 10 m, University Lake is fed  
89 by three streams that drain mature oak-beech-maple forest. The underlying geology is  
90 Harrodsburg limestone on ridgetops and Borden siltstone/shale in valleys. The thin unglaciated  
91 soils surrounding the reservoir are Brownstown-Gilwood silt loams.

92 ***Bacterial community structure*** — We collected surface-water samples along a longitudinal  
93 transect through University Lake in July 2013, filtering epilimnetic biomass from 200 mL of  
94 water onto 0.2 µm Supor Filters (47 mm diameter, Pall). We characterized composition of the  
95 active and total portions of the bacterial communities by sequencing 16S rRNA genes (DNA)  
96 and transcripts (RNA), respectively. While sequences recovered from the DNA pool can come  
97 from active or inactive individuals, sequences from the RNA pool are commonly used to study  
98 active microorganisms given that rRNA transcripts have short half-lives and that ribosomes are  
99 required by growing cells for protein synthesis (Molin and Givskov 1999, Steiner et al. 2019,  
100 Bowsher et al. 2019, Locey et al. 2019). Sequences were processed in *mothur* (v. 1.41.1, Schloss  
101 et al. 2009) and operational taxonomic units (OTUs) were created using the OptiClust algorithm  
102 (Westcott and Schloss 2017). See supplement for detailed methods.

103 ***Quantifying patterns of diversity along the flow path*** — We analyzed within sample ( $\alpha$ ) and  
104 among sample ( $\beta$ ) diversity along the flow path. We estimated  $\alpha$ -diversity using rarefaction in the

105 ‘iNEXT’ R package (Hsieh et al. 2016), following singleton-correction for sequence data (Chiu  
106 and Chao 2016). Hill numbers for a given order,  $q$ , were used to weigh common and rare species  
107 using the equation  ${}^qD = \left(\sum_{i=1}^S p_i^q\right)^{\frac{1}{1-q}}$ , where  $p_i$  is the relative abundance of species  $i = 1, \dots, S$ .  
108 The value  ${}^qD$  is the number of equally abundant species that would yield the observed value of a  
109 diversity metric, such as richness ( $q = 0$ ), Shannon’s index ( $q = 1$ ), or Simpson’s index ( $q = 2$ ).  
110 We measured  $\beta$ -diversity as average percent similarity (1 – Bray-Curtis) between each sample  
111 using the ‘vegan’ package in R (Oksanen et al. 2019). We used indicator-variables multiple  
112 regression to test for the main effects and interaction of molecule type (RNA vs. DNA) and flow-  
113 path distance on  $\alpha$ - and  $\beta$ -diversity.

114 To make inferences about niche selection on terrestrial bacteria, we measured changes in the  
115 relative abundances of OTUs that were recovered in the DNA and RNA pools. To quantify the  
116 loss rate of terrestrial-derived bacteria, we used the slope of a simple linear regression between  
117 distance along the transect and the number of terrestrial OTUs present but never active in aquatic  
118 samples. To determine possible contributions of soil-derived taxa to active aquatic diversity, we  
119 focused on OTUs that were metabolically active across a majority of aquatic samples (we present  
120 results for a 75% threshold in main text, others in supplement). All statistical analyses were  
121 conducted in R (version 3.5.2, R Core Team 2018).

122

123

## RESULTS

124 Patterns of bacterial diversity along the flow path were strongly influenced by metabolic  
125 heterogeneity (Fig. 2a,  $R^2 = 0.84$ ,  $p < 0.001$ ), as shown by significant differences in slope and  
126 intercept captured by the indicator variable (Table 1). In the total aquatic bacterial community  
127 (DNA), richness was highest near the terrestrial-aquatic interface and declined toward the dam.

128 In comparison, the active aquatic richness was lower and less variable along the transect.  
129 Differences in  $\alpha$ -diversity between active and total portions of the community were highest near  
130 the terrestrial-aquatic interface (e.g., there were 78% fewer taxa in the active subset, Table 1).  
131 Diversity differences were greatest when rare and common taxa were equally weighted ( $q = 0$ ),  
132 as might be expected if immigrant or dormant taxa are rare. When dominant taxa were weighted  
133 more heavily ( $q = 1, 2$ ), the active portion remained less diverse, but the decay rates of diversity  
134 became indistinguishable between the two portions of the community (Table 1).

135 Metabolic heterogeneity also has strong effects on  $\beta$ -diversity (Fig. 2b). Similarity between  
136 terrestrial soil and aquatic samples was highest near the terrestrial-aquatic interface and  
137 decreased toward the dam ( $R^2 = 0.75$ ,  $p < 0.001$ ). However, maximum similarity to soils and the  
138 rate of decay in similarity differed between the total and active portion of the community. Near  
139 the stream inlet, similarity to soils was nearly 6 times higher in the total community than in the  
140 active portion ( $Intercept = 0.169$ ,  $\beta_{RNA} = -0.138$ ), and similarity to soils declined linearly toward  
141 the dam ( $\beta_{distance} = -4 \times 10^{-4}$ ,  $\beta_{distance \times RNA} = -3.9 \times 10^{-4}$ ). In contrast, the active portion remained  
142 dissimilar to terrestrial soils along the entire transect (Fig. 2b).

143 We detected a small number of habitat generalists, but most terrestrial taxa did not appear to  
144 colonize the aquatic community. The majority of taxa present in both soil and aquatic  
145 communities were never detected in any active aquatic sample (~88% of taxa remained inactive),  
146 which accounted for roughly 4.5% of all reads in the total reservoir community. The richness of  
147 these taxa declined exponentially (first-order decay,  $k = 2.57 \times 10^{-3}$ ,  $r^2=0.81$ ,  $p < 0.001$ ) with  
148 distance from the stream inlet (Fig. 3a). However, 8% of taxa present in soils were detected at  
149 least once in the active aquatic community. Of the soil-derived taxa detected in at least 75% of

150 active aquatic samples, 18 declined along the transect, but 11 were maintained at high relative  
151 abundances in the active aquatic community (Fig. 3; see supplement for list of taxa).

152

## 153 **DISCUSSION**

154 Our results demonstrate that the importance of dispersal for community assembly across  
155 ecosystem boundaries depends on the metabolic activity of dispersers in the meta-ecosystem.

156 Along a terrestrial-aquatic flow path, the influence of terrestrial bacteria on aquatic bacterial  $\alpha$ -  
157 and  $\beta$ -diversity was highest near the terrestrial-aquatic interface. This pattern, consistent with  
158 terrestrial immigration playing an important role in aquatic community assembly (i.e., mass  
159 effects), was only detected when metabolic heterogeneity was not considered. In contrast,  $\alpha$ -  
160 diversity and similarity to soils were substantially lower in the metabolically active portion of the  
161 aquatic community (Table 1; Fig. 2), suggesting a hidden role for niche selection in the aquatic  
162 habitat that was only apparent when incorporating metabolic information. In fact, most  
163 terrestrial-derived taxa were not detected in the active aquatic community and decayed  
164 exponentially away from the terrestrial-aquatic interface (Fig. 3a). Altogether, our findings are  
165 consistent with our hypotheses that most terrestrial-derived taxa fail to colonize aquatic habitats  
166 and that only a small number of habitat generalists may be able to colonize aquatic environments  
167 from nearby terrestrial landscapes. Our study also suggests the potentially overlooked role of  
168 metabolic heterogeneity in spatially heterogeneous metacommunities and meta-ecosystems.

169 ***Metabolic heterogeneity informs aquatic community assembly*** — Inferring community  
170 assembly processes from diversity patterns is challenging because species can be present in a  
171 habitat for reasons other than habitat suitability (e.g., high dispersal, persistence traits).

172 Accounting for metabolic heterogeneity helps distinguish favorable from suboptimal habitats by



173 detecting the responses of actively growing organisms (e.g., Muscarella et al. 2016), providing  
174 insight into the fate and potential functions of dispersers in recipient ecosystems. The frequent  
175 detection of terrestrial bacteria in aquatic ecosystems has elevated the role of dispersal for  
176 structuring aquatic diversity, but our results suggest that local aquatic environments can still  
177 impose harsh biotic or abiotic filters on the metabolically active subset of the aquatic community  
178 (Fig. 2). Thus, the strength of niche selection against terrestrial-derived bacteria in aquatic  
179 habitats may increase with metabolic activity levels of cross-boundary dispersers.

180 ***Exponential decay of soil-derived bacteria in aquatic ecosystems*** — Dispersing across an  
181 ecosystem boundary is likely a harsh transition for many bacteria. Although most active aquatic  
182 taxa were also detected in nearby soils, only a minority of taxa present in soils were common in  
183 the active aquatic community (Fig. 3). Consistent with previous terrestrial-aquatic meta-  
184 ecosystem studies (Mariadassou et al. 2015, Monard et al. 2016), our results suggest that active  
185 abundance is highest in preferred habitat types. The exponential decay of metabolically inactive  
186 terrestrial taxa away from the terrestrial-aquatic interface also resembles diversity declines near  
187 river margins (Power et al. 2004). This exponential loss could be due to physical factors (e.g.,  
188 settling or volumetric dilution) or biotic interactions (e.g., consumption, competition, or lysis  
189 following reactivation) that are not offset by reproduction. Future studies that differentiate  
190 activities at a finer resolution (e.g., slow growing, dormant with the potential to reactivate, or  
191 even dead) (Carini et al. 2016, Lennon et al. 2018) could further illuminate the fate of cross-  
192 boundary dispersers in meta-ecosystems. In general, the exponential decay suggests that  
193 terrestrial influences on aquatic bacterial diversity may be localized near ecosystem boundaries.

194 Nevertheless, a subset of taxa detected in soils were active in the aquatic community. Some  
195 became less common along the transect, which could reflect a riverine-to-lacustrine

196 environmental gradient, or a reduction in mass effects (Fig. 3b). These decaying taxa included  
197 representatives from the Actinobacteria (*Arthrobacter*, *Micrococcus*, *Solirubrobacter*),  
198 Bacteroidetes (*Flavobacterium*, *Pedobacter*), Proteobacteria ( $\alpha$ : *Bradyrhizobium*, *Sphingomonas*;  
199  $\beta$ : *Duganella*, *Comamonas*; and  $\gamma$ : *Pseudomonas* sp.), some of which are abundant and  
200 ubiquitous in soils (Delgado-Baquerizo et al. 2018). In contrast, taxa maintained in the active  
201 aquatic community may have wide niche breadths allowing them to be habitat generalists, or they  
202 may be of aquatic origin (e.g., dispersed by floods, animals, or wind, but our soil sampling  
203 locations were chosen to minimize this possibility). These potential habitat generalists included  
204 taxa belonging to the Actinomycetales, Bacteroidetes (order Sphingobacteriales), Proteobacteria  
205 ( $\alpha$ : order Rhizobiales,  $\beta$ : family Comamonadaceae,  $\gamma$ : *Acinetobacter*), and Verrucomicrobia  
206 (class Spartobacteria). In sum, most terrestrial-derived bacteria may possess persistence strategies  
207 that allow them to persist on the periphery of aquatic ecosystems, but habitat generalists that  
208 cross ecosystem boundaries could influence aquatic bacterial community assembly.

209 ***Metabolic heterogeneity in metacommunities and meta-ecosystems*** — Our work provides  
210 empirical evidence that accounting for metabolic heterogeneity may improve our understanding  
211 of metacommunity and meta-ecosystem processes (Massol et al. 2017, Wisnoski et al. 2019).  
212 Cross-boundary dispersal can expose organisms to harsh environmental conditions, against  
213 which they may be buffered through metabolic flexibility (e.g., slow growth, dormancy). While  
214 generalists may be able to colonize a range of habitat types in meta-ecosystems (Haegeman and  
215 Loreau 2014), specialist dispersal may require coupling with resource subsidies or persistence  
216 strategies that buffer against suboptimal conditions. Metabolically explicit community assembly  
217 also has implications for ecosystem functioning in a spatial context. While high dispersal is  
218 predicted to impede ecosystem functioning by creating species-environment mismatches

219 (Leibold et al. 2017), these effects may be reduced if dispersers are metabolically inactive. Thus,  
220 metabolic heterogeneity may be an important link between individuals, communities, and  
221 ecosystems across spatial scales.

222

223

## ACKNOWLEDGEMENTS

224 We thank Nick Nelson and the Holland Summer Science Program, the National Science  
225 Foundation DEB-1442246 (JTL), and the US Army Research Office Grant W911NF-14-1-0411  
226 (JTL). Data and code can be found at NCBI (BioProject PRJNA547598) and GitHub  
227 (<https://github.com/LennonLab/ReservoirGradient>).

228

229

## REFERENCES

230 Barcina, I., P. Lebaron, and J. Vives-Rego. 1997. Survival of allochthonous bacteria in aquatic  
231 systems: a biological approach. *FEMS Microbiology Ecology* 23:1–9.

232 Berggren, M., L. Ström, H. Laudon, J. Karlsson, A. Jonsson, R. Giesler, A.-K. Bergström, and  
233 M. Jansson. 2010. Lake secondary production fueled by rapid transfer of low molecular  
234 weight organic carbon from terrestrial sources to aquatic consumers. *Ecology Letters*  
235 13:870–880.

236 Bergström, A.-K., and M. Jansson. 2000. Bacterioplankton production in humic Lake Örträsket  
237 in relation to input of bacterial cells and input of allochthonous organic carbon. *Microbial*  
238 *Ecology* 39:101–115.

239 Bowsher, A. W., P. J. Kearns, and A. Shade. 2019. 16S rRNA/rRNA gene ratios and cell activity  
240 staining reveal consistent patterns of microbial activity in plant-associated soil. *mSystems*  
241 4:e00003-19.

- 242 Carini, P., P. J. Marsden, J. W. Leff, E. E. Morgan, M. S. Strickland, and N. Fierer. 2016. Relic  
243 DNA is abundant in soil and obscures estimates of soil microbial diversity. *Nature*  
244 *Microbiology* 2:1–6.
- 245 Chiu, C. H., and A. Chao. 2016. Estimating and comparing microbial diversity in the presence of  
246 sequencing errors. *PeerJ* 4:e1634.
- 247 Crump, B. C., L. A. Amaral-Zettler, and G. W. Kling. 2012. Microbial diversity in arctic  
248 freshwaters is structured by inoculation of microbes from soils. *The ISME journal* 6:1629–  
249 1639.
- 250 Delgado-Baquerizo, M., A. M. Oliverio, T. E. Brewer, A. Benavent-González, D. J. Eldridge, R.  
251 D. Bardgett, F. T. Maestre, B. K. Singh, and N. Fierer. 2018. A global atlas of the dominant  
252 bacteria found in soil. *Science* 359:320–325.
- 253 Gounand, I., E. Harvey, C. J. Little, and F. Altermatt. 2018a. Meta-ecosystems 2.0: rooting the  
254 theory into the field. *Trends in Ecology & Evolution* 33:36–46.
- 255 Gounand, I., C. J. Little, E. Harvey, and F. Altermatt. 2018b. Cross-ecosystem carbon flows  
256 connecting ecosystems worldwide. *Nature Communications* 9:4825.
- 257 Gravel, D., F. Guichard, M. Loreau, and N. Mouquet. 2010. Source and sink dynamics in meta-  
258 ecosystems. *Ecology* 91:2172–2184.
- 259 Haegeman, B., and M. Loreau. 2014. General relationships between consumer dispersal,  
260 resource dispersal and metacommunity diversity. *Ecology Letters* 17:175–184.
- 261 Hsieh, T. C., K. H. Ma, and A. Chao. 2016. iNEXT: an R package for rarefaction and  
262 extrapolation of species diversity (Hill numbers). *Methods in Ecology and Evolution* 7:1451–  
263 1456.

- 264 Langenheder, S., and E. S. Lindström. 2019. Factors influencing aquatic and terrestrial bacterial  
265 community assembly. *Environmental Microbiology Reports* 11:306–315.
- 266 Leibold, M. A., J. M. Chase, and S. K. M. Ernest. 2017. Community assembly and the  
267 functioning of ecosystems: how metacommunity processes alter ecosystems attributes.  
268 *Ecology* 98:909–919.
- 269 Lennon, J. T., and S. E. Jones. 2011. Microbial seed banks: the ecological and evolutionary  
270 implications of dormancy. *Nature Reviews Microbiology* 9:119–130.
- 271 Lennon, J. T., M. E. Muscarella, S. A. Placella, and B. K. Lehmkuhl. 2018. How, when, and  
272 where relic DNA affects microbial diversity. *mBio* 9:e00637-18.
- 273 Lever, M. A., K. L. Rogers, K. G. Lloyd, J. Overmann, B. Schink, R. K. Thauer, T. M. Hoehler,  
274 and B. B. Jørgensen. 2015. Life under extreme energy limitation: a synthesis of laboratory-  
275 and field-based investigations. *FEMS Microbiology Reviews* 39:688–728.
- 276 Lindström, E. S., and S. Langenheder. 2012. Local and regional factors influencing bacterial  
277 community assembly. *Environmental Microbiology Reports* 4:1–9.
- 278 Locey, K. J., M. E. Muscarella, M. L. Larsen, S. R. Bray, S. E. Jones, and J. T. Lennon. 2019.  
279 Dormancy dampens the microbial distance-decay relationship. *bioRxiv*:717546.
- 280 Mariadassou, M., S. Pichon, and D. Ebert. 2015. Microbial ecosystems are dominated by  
281 specialist taxa. *Ecology Letters* 18:974–982.
- 282 Massol, F., F. Altermatt, I. Gounand, D. Gravel, M. A. Leibold, and N. Mouquet. 2017. How  
283 life-history traits affect ecosystem properties: effects of dispersal in meta-ecosystems. *Oikos*  
284 126:532–546.

- 285 Massol, F., D. Gravel, N. Mouquet, M. W. Cadotte, T. Fukami, and M. A. Leibold. 2011.  
286 Linking community and ecosystem dynamics through spatial ecology. *Ecology Letters*  
287 14:313–323.
- 288 Molin, S., and M. Givskov. 1999. Application of molecular tools for in situ monitoring of  
289 bacterial growth activity. *Environmental Microbiology* 1:383–391.
- 290 Monard, C., S. Gantner, S. Bertilsson, S. Hallin, and J. Stenlid. 2016. Habitat generalists and  
291 specialists in microbial communities across a terrestrial-freshwater gradient. *Scientific*  
292 *Reports* 6:37719.
- 293 Muscarella, M. E., S. E. Jones, and J. T. Lennon. 2016. Species sorting along a subsidy gradient  
294 alters bacterial community stability. *Ecology* 97:2034–2043.
- 295 Nemergut, D. R. et al. 2013. Patterns and processes of microbial community assembly.  
296 *Microbiology and Molecular Biology Reviews* 77:342–356.
- 297 Oksanen, J. et al. 2019. *vegan: Community Ecology Package*. R package version 2.5-4.  
298 <https://CRAN.R-project.org/package=vegan>.
- 299 Polis, G. A., M. E. Power, and G. R. Huxel, editors. 2004. *Food webs at the landscape level*. The  
300 University of Chicago Press, Chicago, IL.
- 301 Power, M. E. et al. 2004. River-to-watershed subsidies in an old-growth conifer forest. Pages  
302 217–240 *in* G. A. Polis, M. E. Power, and G. R. Huxel, editors. *Food webs at the landscape*  
303 *level*. The University of Chicago Press, Chicago, IL.
- 304 R Core Team. 2018. *R: A language and environment for statistical computing*. R Foundation for  
305 Statistical Computing, Vienna, Austria. URL <https://www.R-project.org/>.
- 306 Ruiz-González, C., J. P. Niño-García, and P. A. del Giorgio. 2015a. Terrestrial origin of bacterial  
307 communities in complex boreal freshwater networks. *Ecology Letters* 18:1198–1206.

- 308 Ruiz-González, C., J. P. Niño-García, J.-F. Lapierre, and P. A. del Giorgio. 2015b. The quality of  
309 organic matter shapes the functional biogeography of bacterioplankton across boreal  
310 freshwater ecosystems. *Global Ecology and Biogeography* 24:1487–1498.
- 311 Schloss, P. D. et al. 2009. Introducing mothur: Open-source, platform-independent, community-  
312 supported software for describing and comparing microbial communities. *Applied and*  
313 *Environmental Microbiology* 75:7537–7541.
- 314 Steiner, P. A., D. D. Corte, J. Geijo, C. Mena, T. Yokokawa, T. Rattei, G. J. Herndl, and E.  
315 Sintes. 2019. Highly variable mRNA half-life time within marine bacterial taxa and  
316 functional genes. *Environmental Microbiology*.
- 317 Thornton, K. W., B. L. Kimmel, and F. E. Payne, editors. 1990. *Reservoir limnology: ecological*  
318 *perspectives*. John Wiley & Sons, New York, NY.
- 319 Westcott, S. L., and P. D. Schloss. 2017. OptiClust, an improved method for assigning amplicon-  
320 based sequence data to operational taxonomic units. *mSphere* 2:e00073-17.
- 321 Wisnoski, N. I., M. A. Leibold, and J. T. Lennon. 2019. Dormancy in metacommunities. *The*  
322 *American Naturalist* 194:135–151.
- 323

324

## TABLES

325 **Table 1** — Linear model coefficients of active and total  $\alpha$ -diversity along the transect examined  
 326 at different levels of  $q$ , which represents equal weighting of rare and common taxa ( $q = 0$ ),  
 327 proportional weighting ( $q = 1$ ), and biased weighting toward common taxa ( $q = 2$ ). In these  
 328 models, intercepts represent estimates of diversity at each order near the terrestrial-aquatic  
 329 interface, with the RNA term capturing the reduced diversity in the active subset. With increasing  
 330 order, the distance  $\times$  RNA interaction becomes weaker, signifying that diversity decays at similar  
 331 rates in the active and total communities as common taxa are increasingly weighted.

| Order ( $q$ ) | Diversity | Term                  | Estimate | Std. Error | Statistic | p-value    |
|---------------|-----------|-----------------------|----------|------------|-----------|------------|
| 0             | Richness  | Intercept             | 1497     | 100.6      | 14.88     | $<10^{-4}$ |
| 0             | Richness  | Distance              | -3.176   | .4976      | -6.381    | $<10^{-4}$ |
| 0             | Richness  | RNA                   | -1170    | 142.3      | -8.222    | $<10^{-4}$ |
| 0             | Richness  | Distance $\times$ RNA | 2.985    | .7003      | 4.263     | .0003      |
| 1             | Shannon   | Intercept             | 153.7    | 19.41      | 7.921     | $<10^{-4}$ |
| 1             | Shannon   | Distance              | -.2941   | 0.096      | -3.062    | 0.0053     |
| 1             | Shannon   | RNA                   | -123.9   | 27.46      | -4.513    | .0001      |
| 1             | Shannon   | Distance $\times$ RNA | 0.2457   | .1352      | 1.818     | 0.0815     |
| 2             | Simpson   | Intercept             | 55.44    | 6.47       | 8.57      | $<10^{-4}$ |
| 2             | Simpson   | Distance              | -.0783   | .032       | -2.446    | 0.0221     |
| 2             | Simpson   | RNA                   | -36.78   | 9.151      | -4.019    | 0.0005     |
| 2             | Simpson   | Distance $\times$ RNA | .0402    | .045       | 0.8918    | 0.3813     |

332

333



334  
335  
336  
337  
338  
339  
340  
341  
342  
343  
344  
345  
346  
347  
348  
349  
350  
351  
352

## FIGURE LEGENDS

**Fig. 1.** University Lake, Indiana University Research and Teaching Preserve, Bloomington, Indiana, USA. Points indicate sampling locations along the terrestrial-aquatic transect, from upstream soils, through the stream inlet, across the lacustrine zone, and over the dam. Image source: Google Earth.

**Fig. 2.** Terrestrial influence on aquatic microbial diversity. (a) Estimated alpha diversity (richness,  ${}^1D$ ) in the active (light gray circles) and total (dark gray triangles) aquatic communities along the reservoir transect. (b) The average percent similarity to the soil samples for active and total aquatic communities declines with distance away from the terrestrial-aquatic interface (0 m).

**Fig. 3.** Fate of terrestrial-derived taxa in the reservoir. (a) Number of taxa detected in soils but never detected in active aquatic samples declines exponentially away from the terrestrial-aquatic interface with a first-order decay constant  $k = 2.57 \times 10^{-3}$ . (b) Taxa detected in at least 75% of active aquatic samples either decay in abundance along the transect or are maintained. We used local polynomial regression (LOESS) to visualize relative abundances for each OTU along the transect.

353

## FIGURES

354

355 **Figure 1.**

356

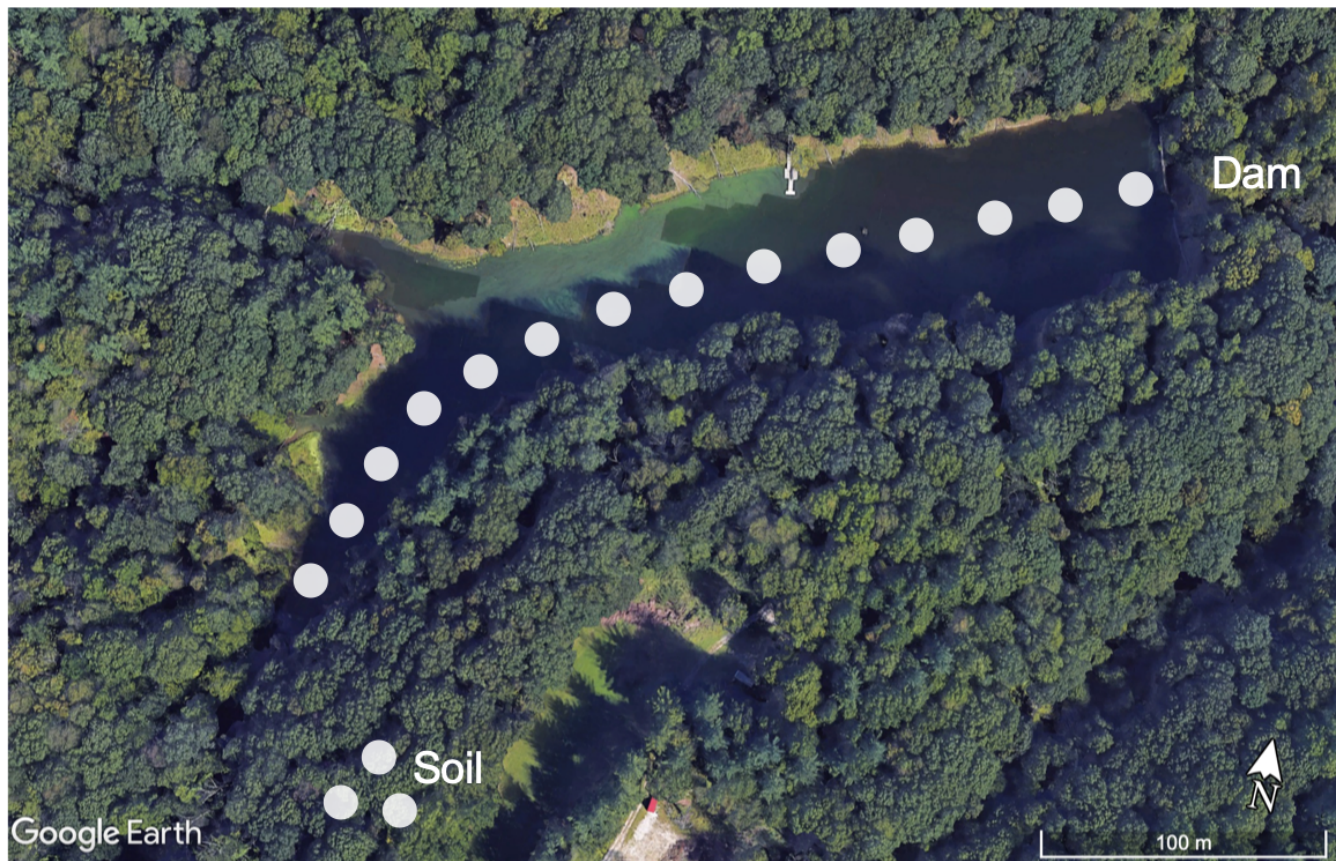

357

358

359 **Figure 2.**

360

361

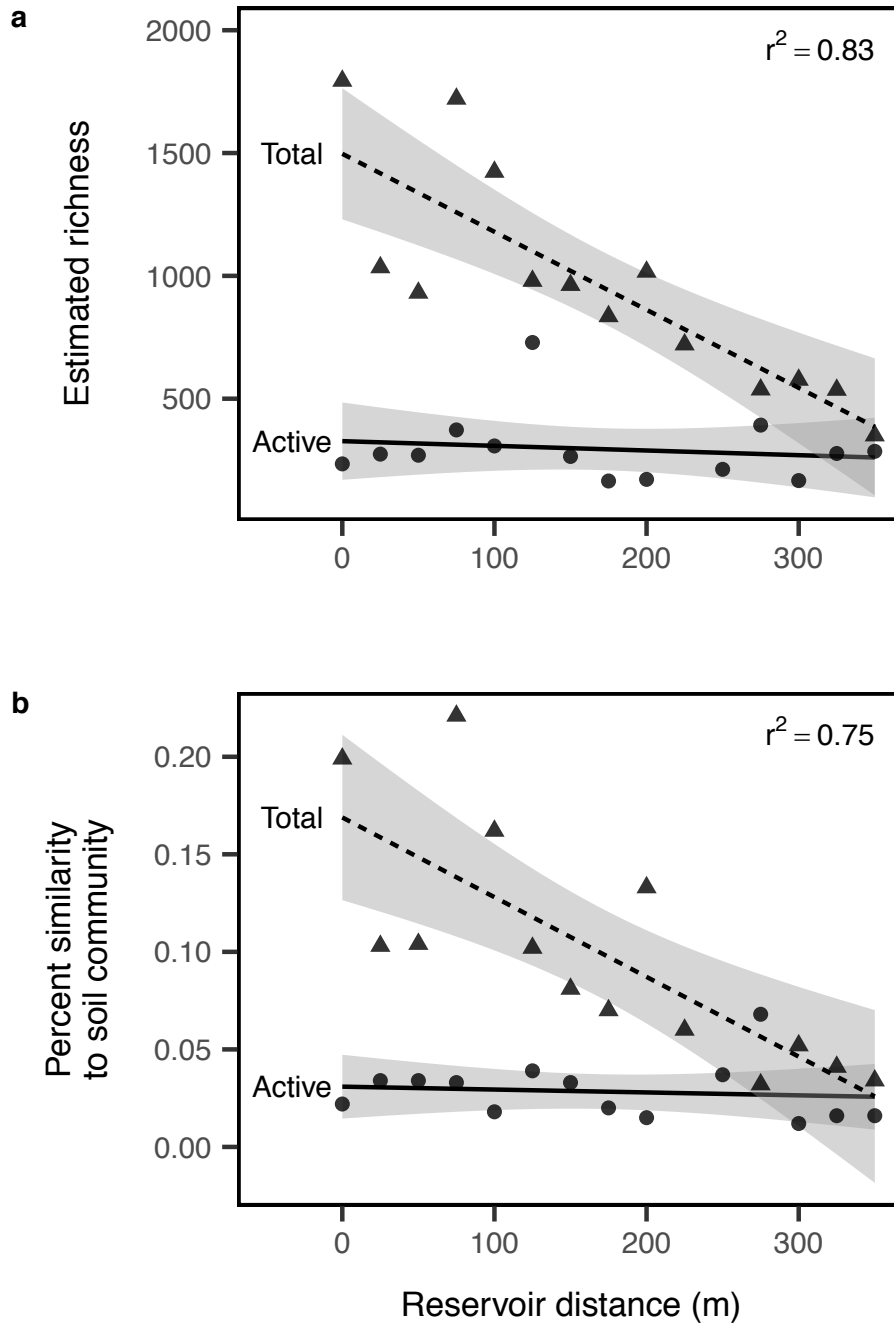

362

363

364 **Figure 3.**

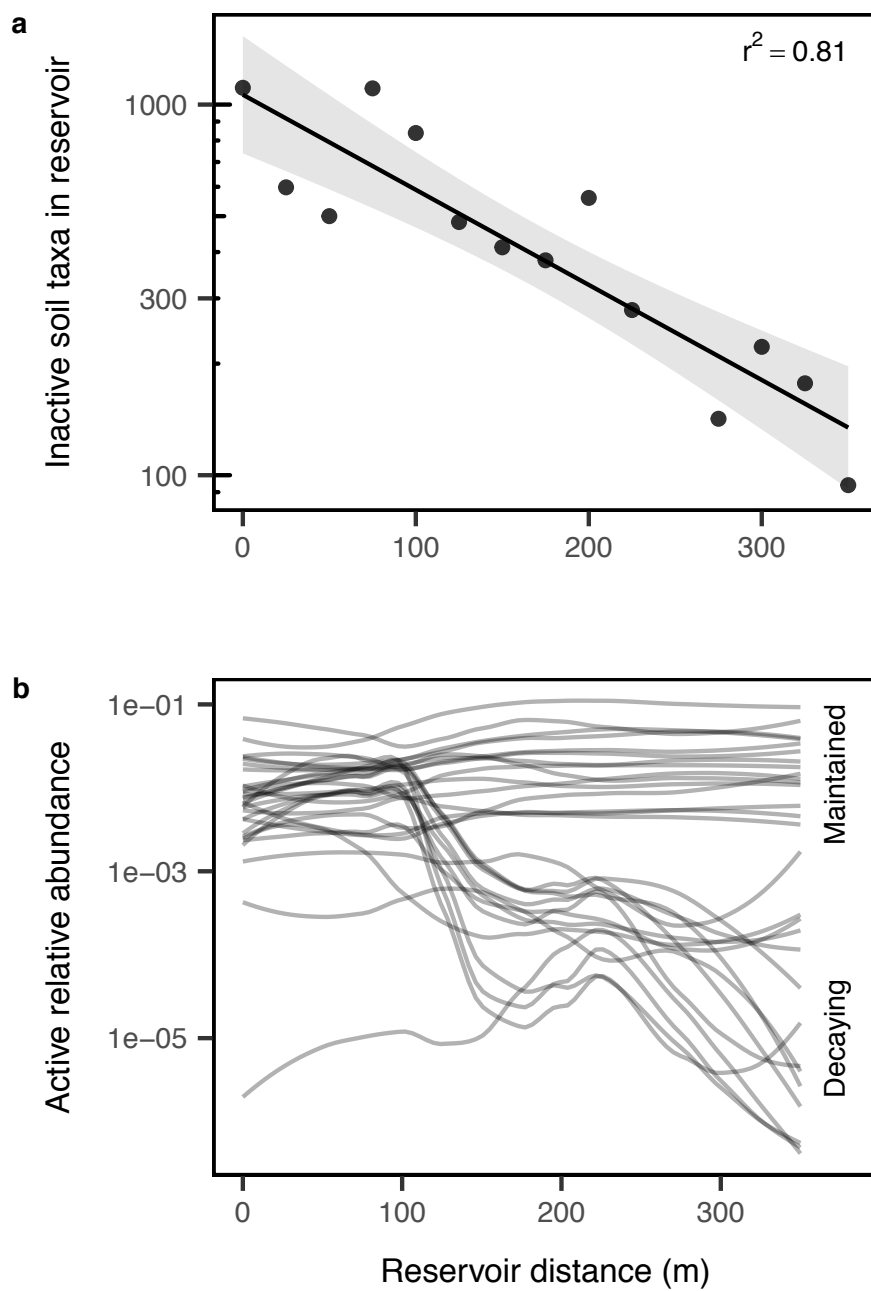

365
